# Supplementary material for: Reversal of the adipostat control of torpor during migration in hummingbirds
Source: eLife journal article supplement (doi:10.7554/elife.70062), 2021-11-22

**Supplementary File 2.** Instantaneous percent fat content over time (as % of night) throughout each summer, fattening, and migration period, as well as during the whole study period for non-fatteners. Red lines represent normothermic nights and blue lines represent torpid nights. The average breeding threshold  $\pm$  1 standard error is indicated by horizontal dashed black and grey lines, respectively.

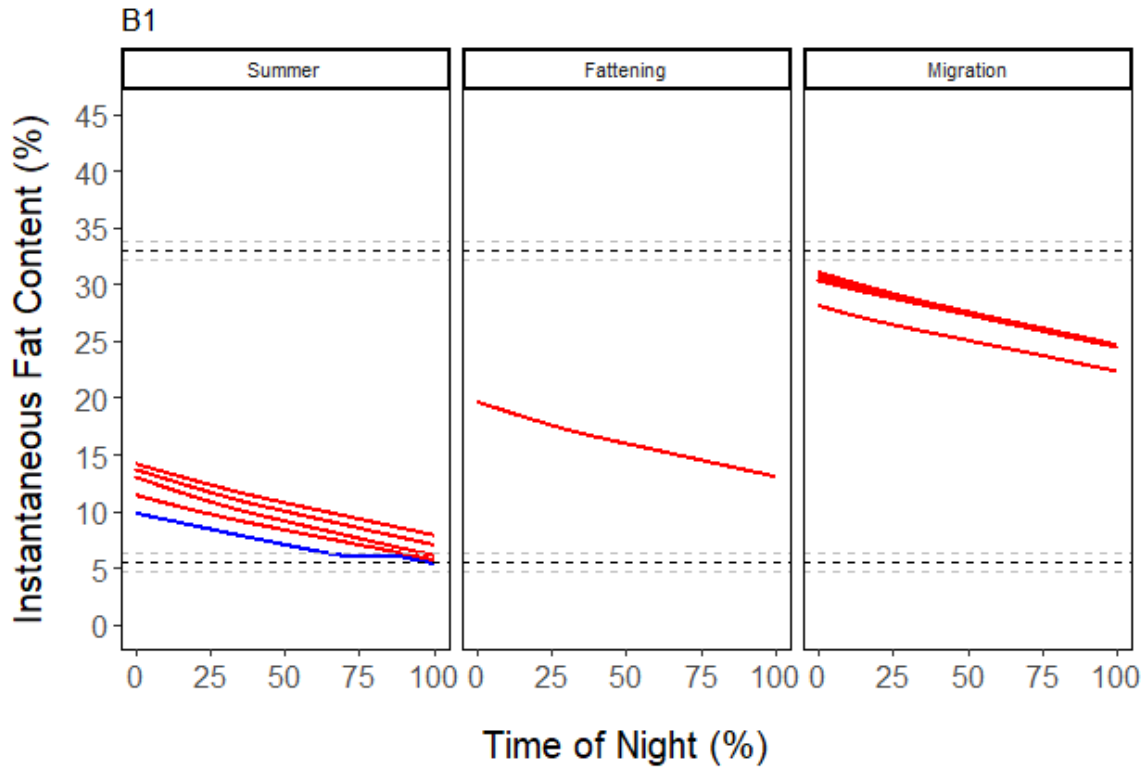

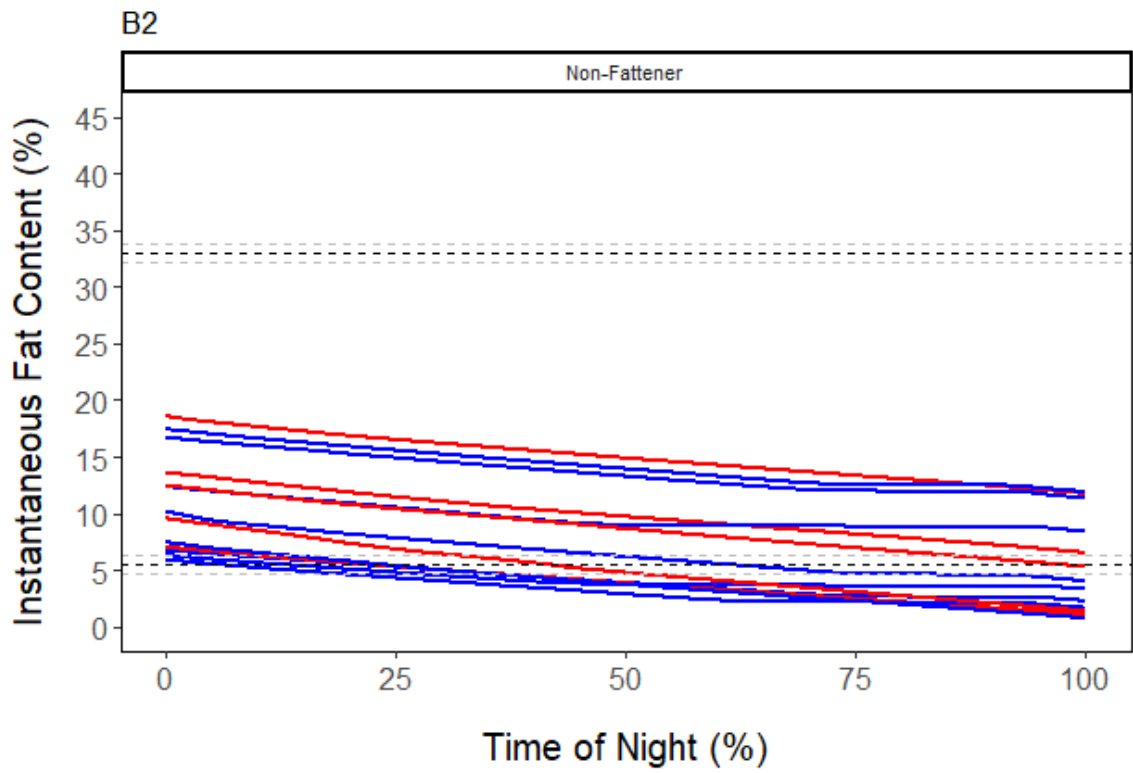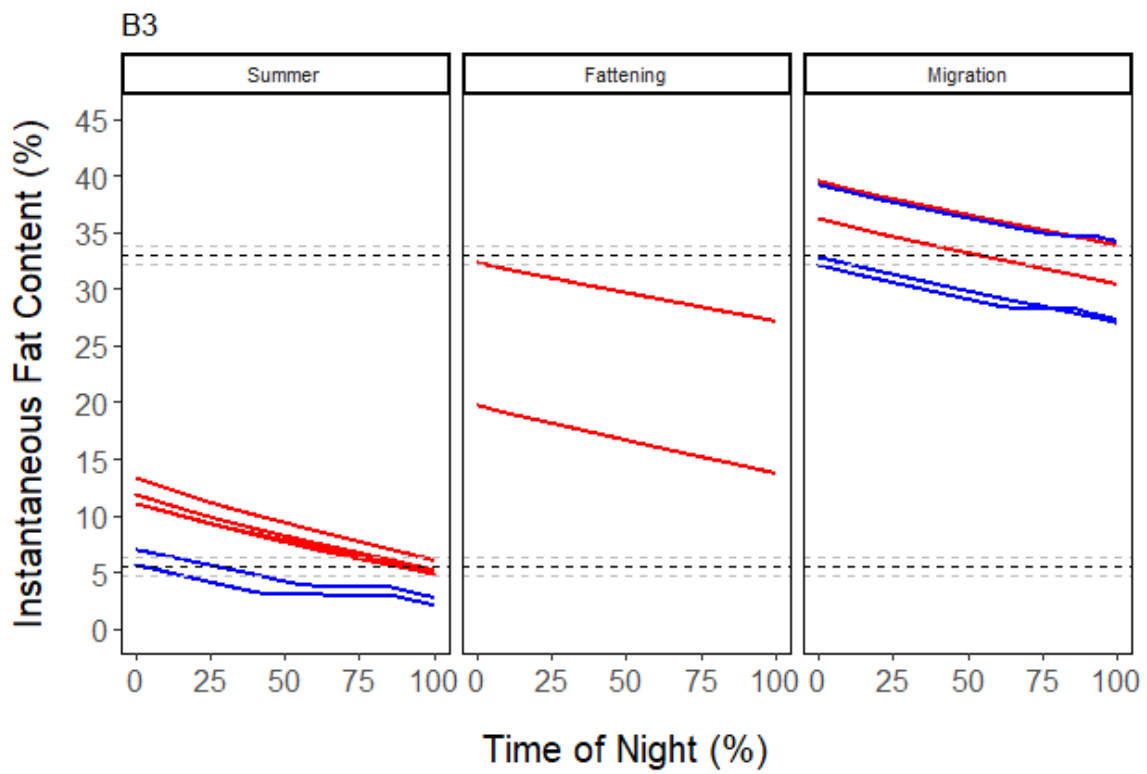

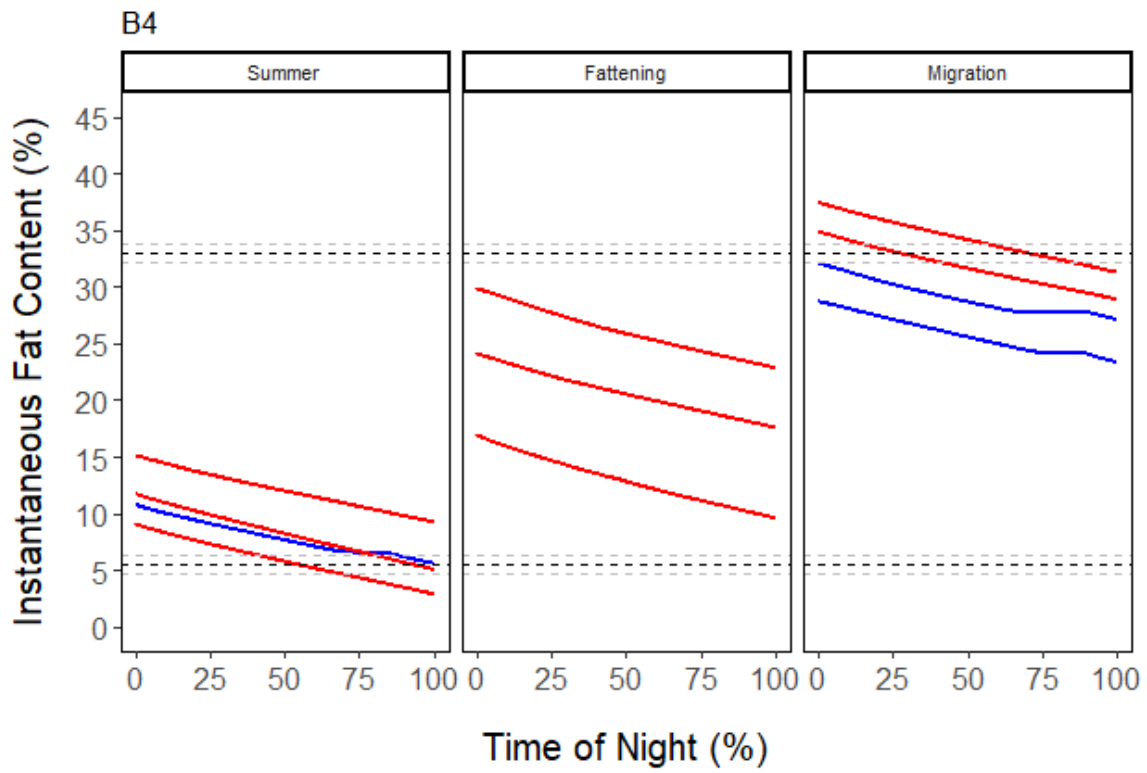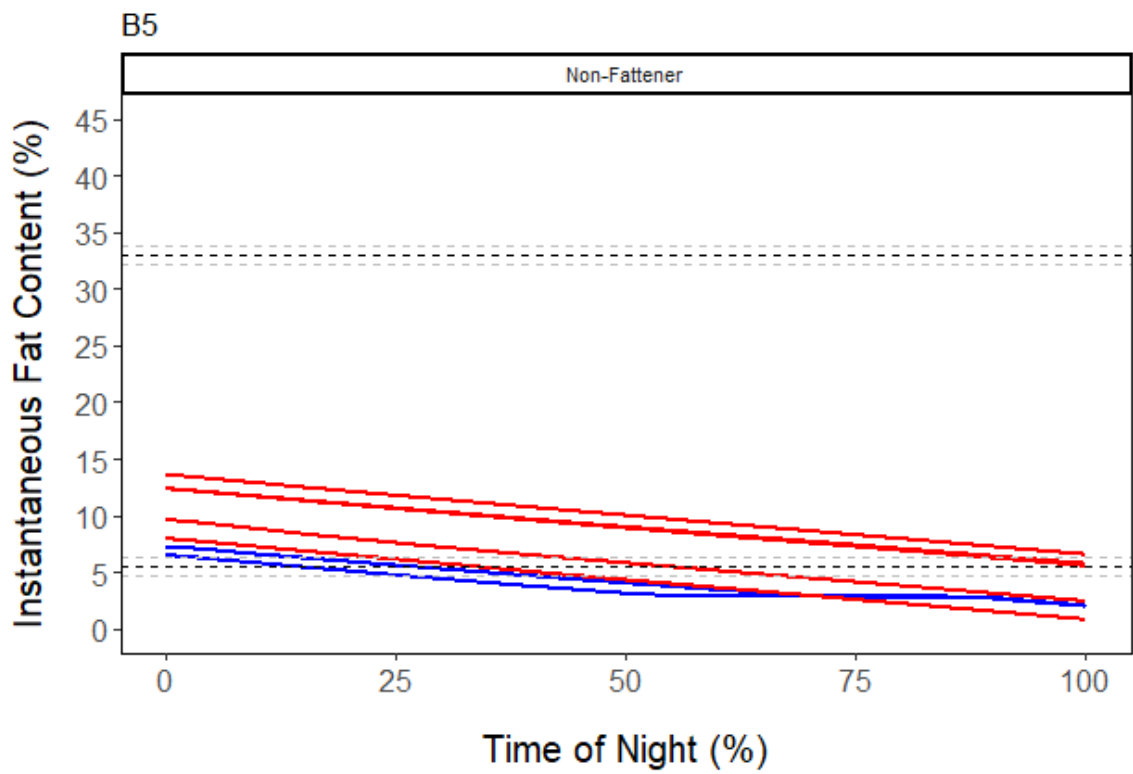

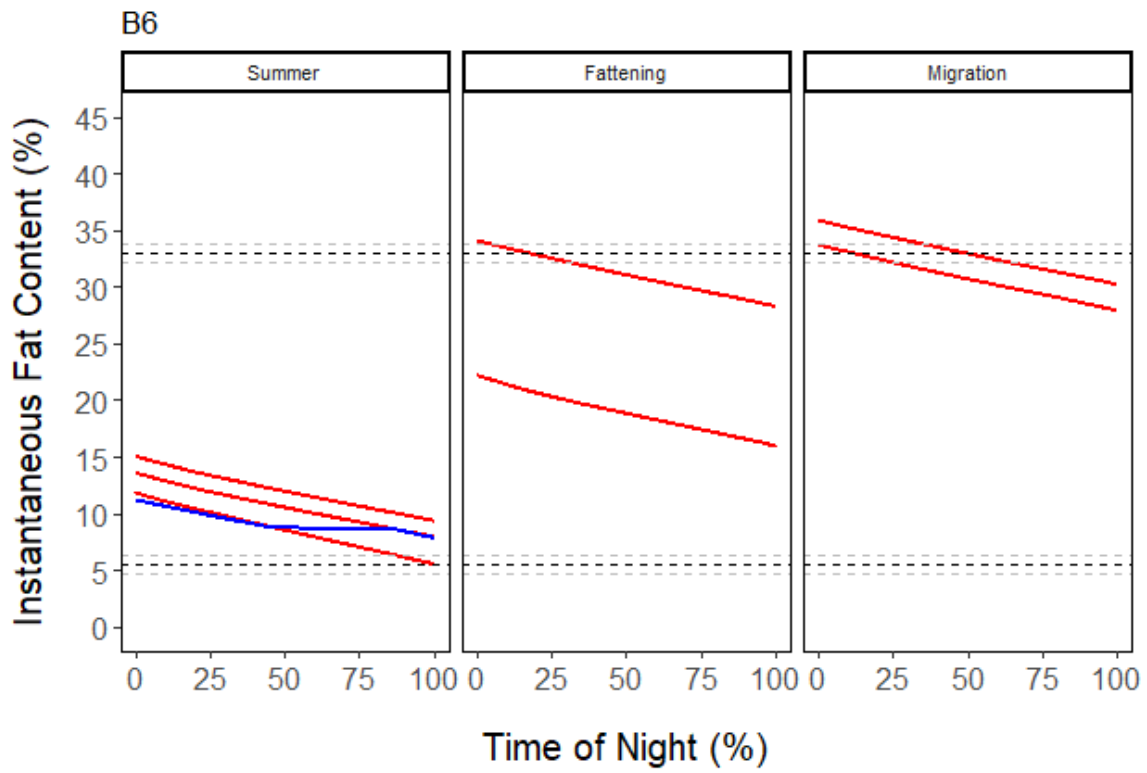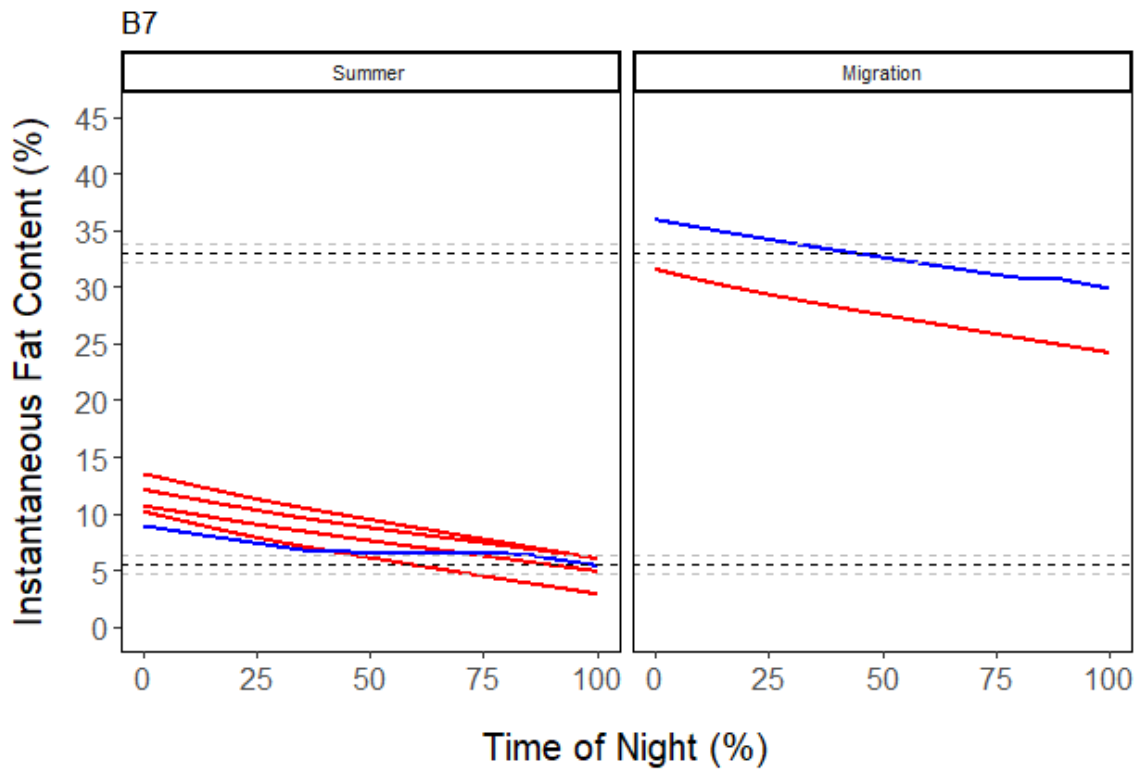

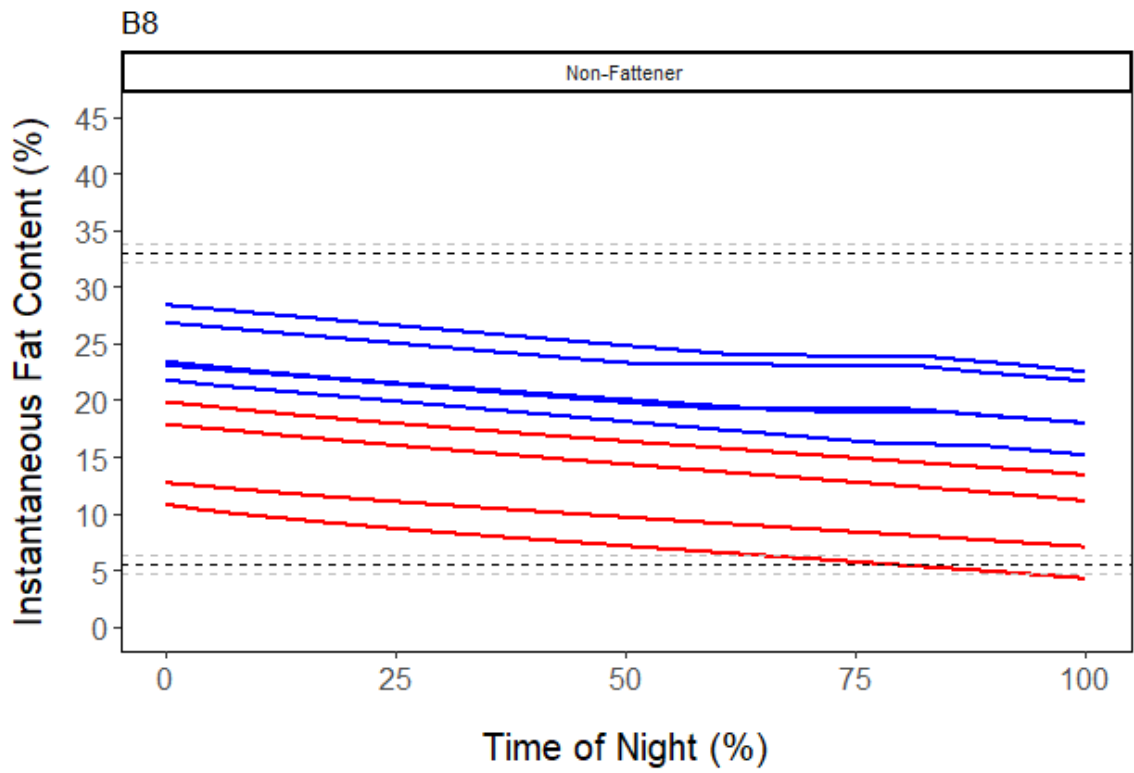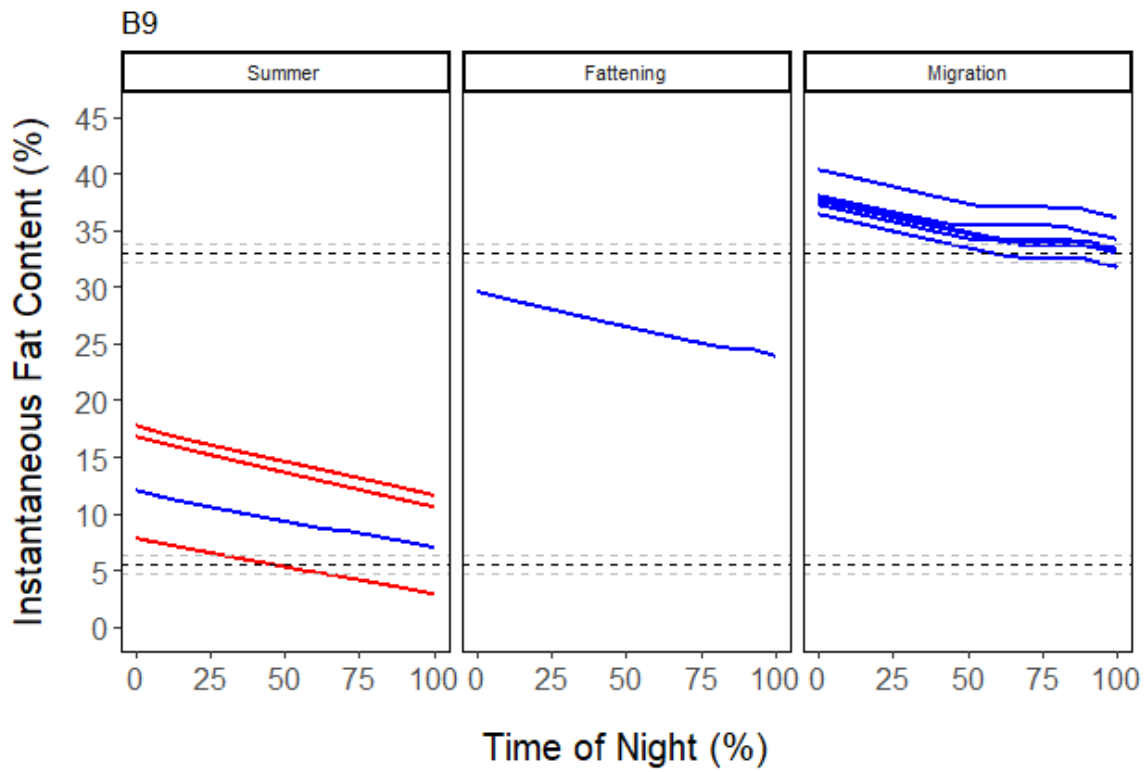

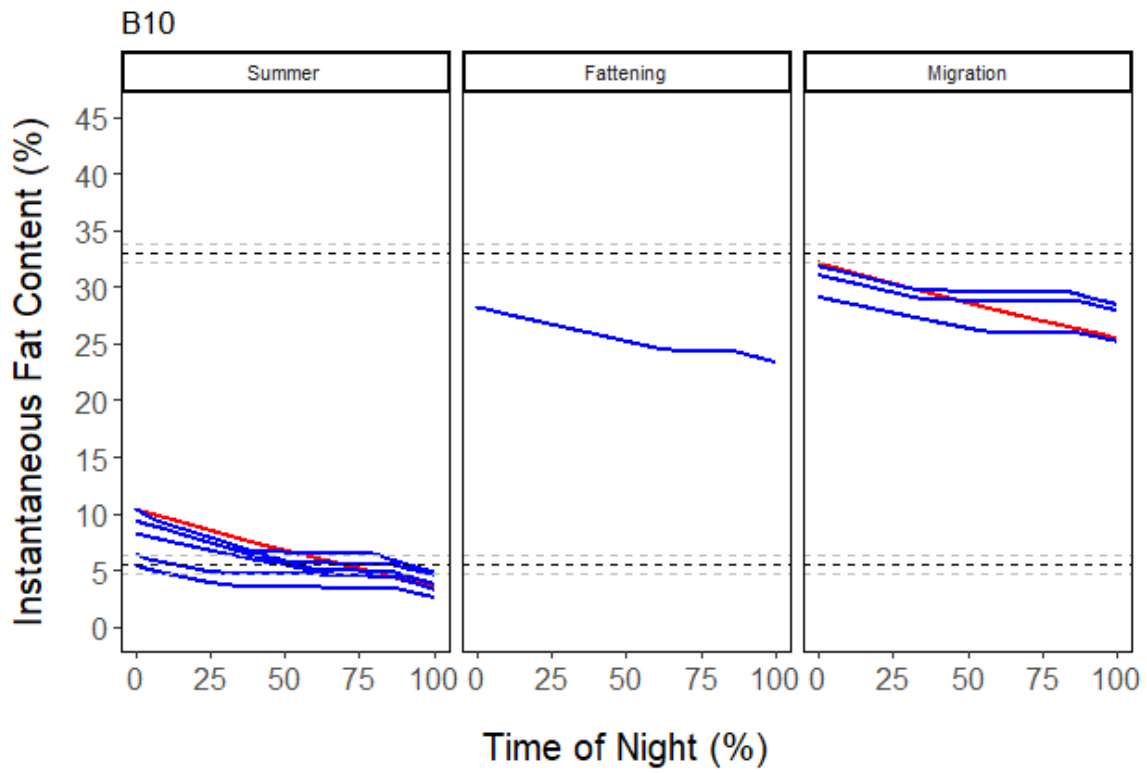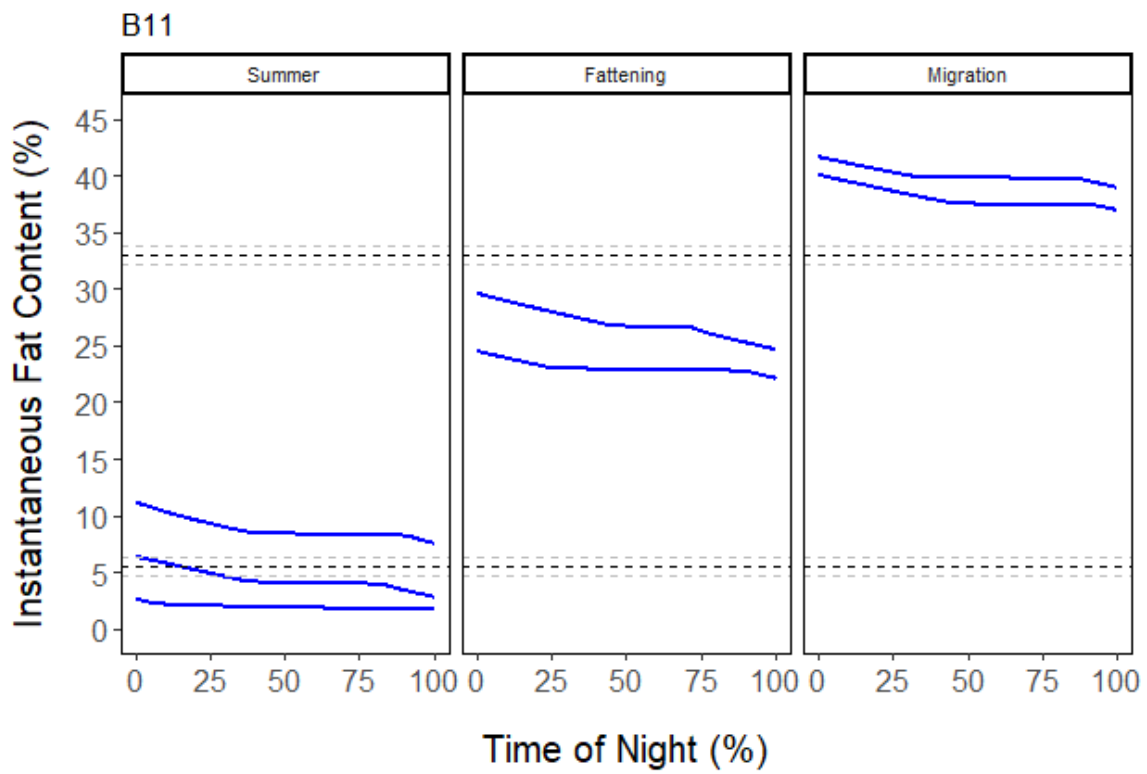

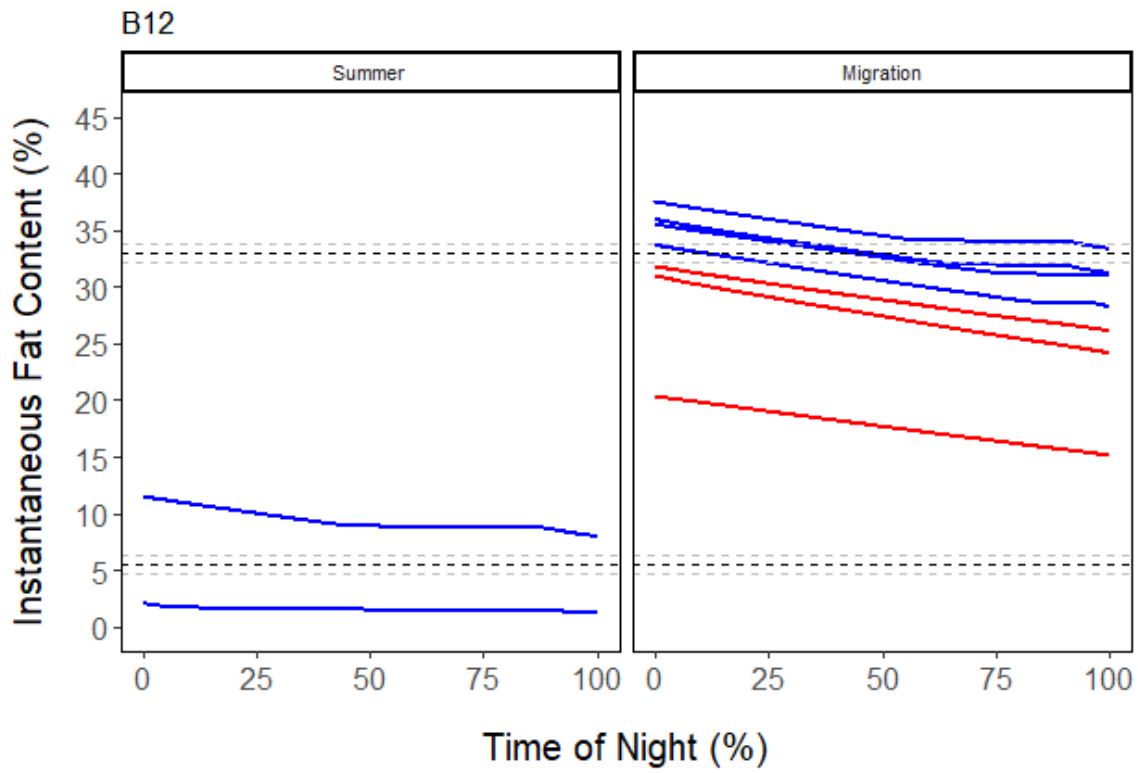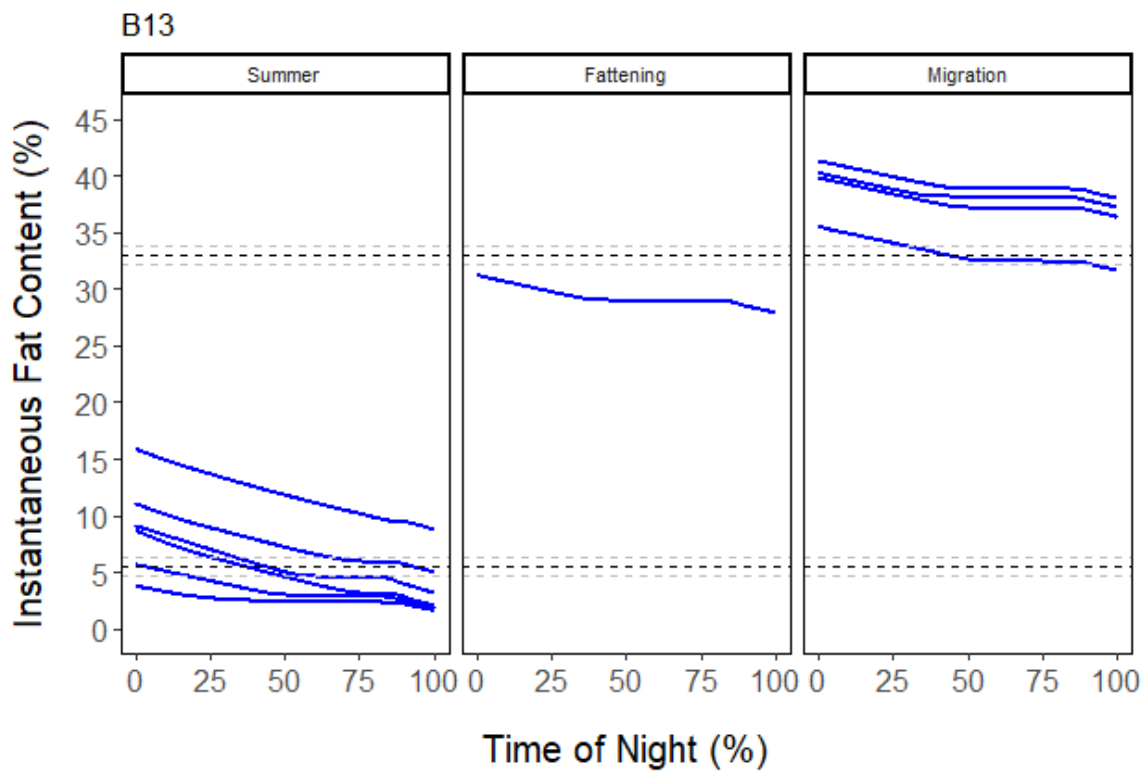

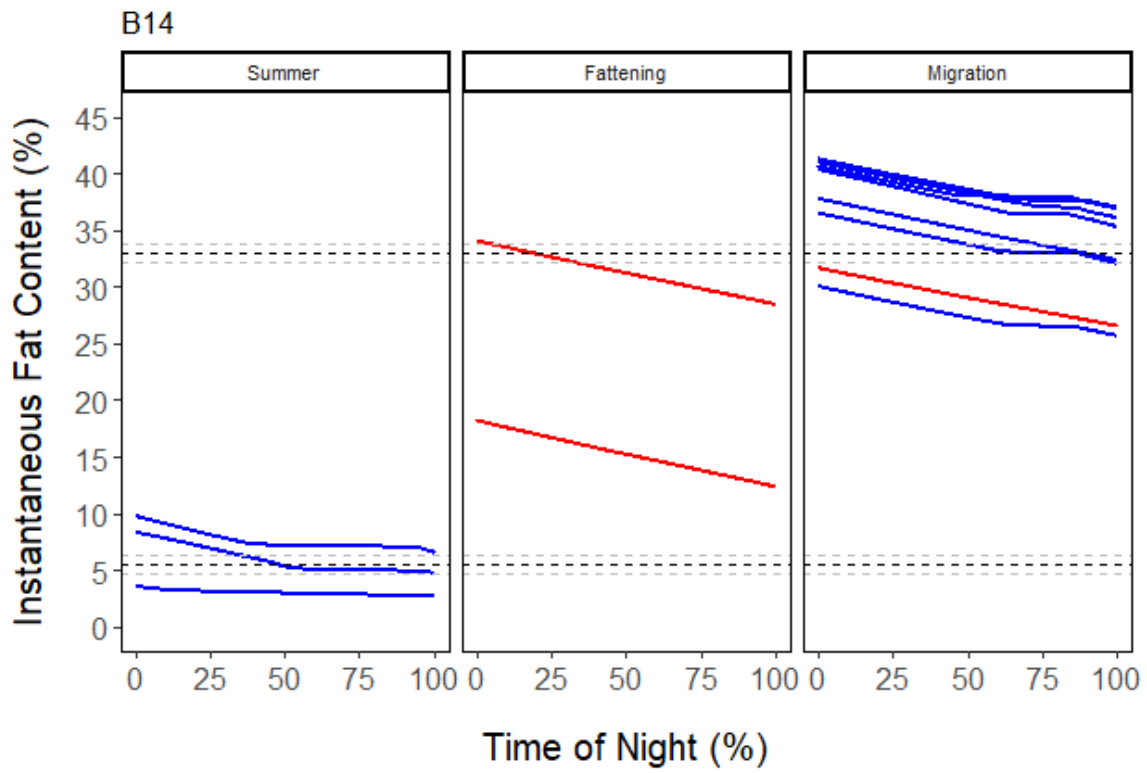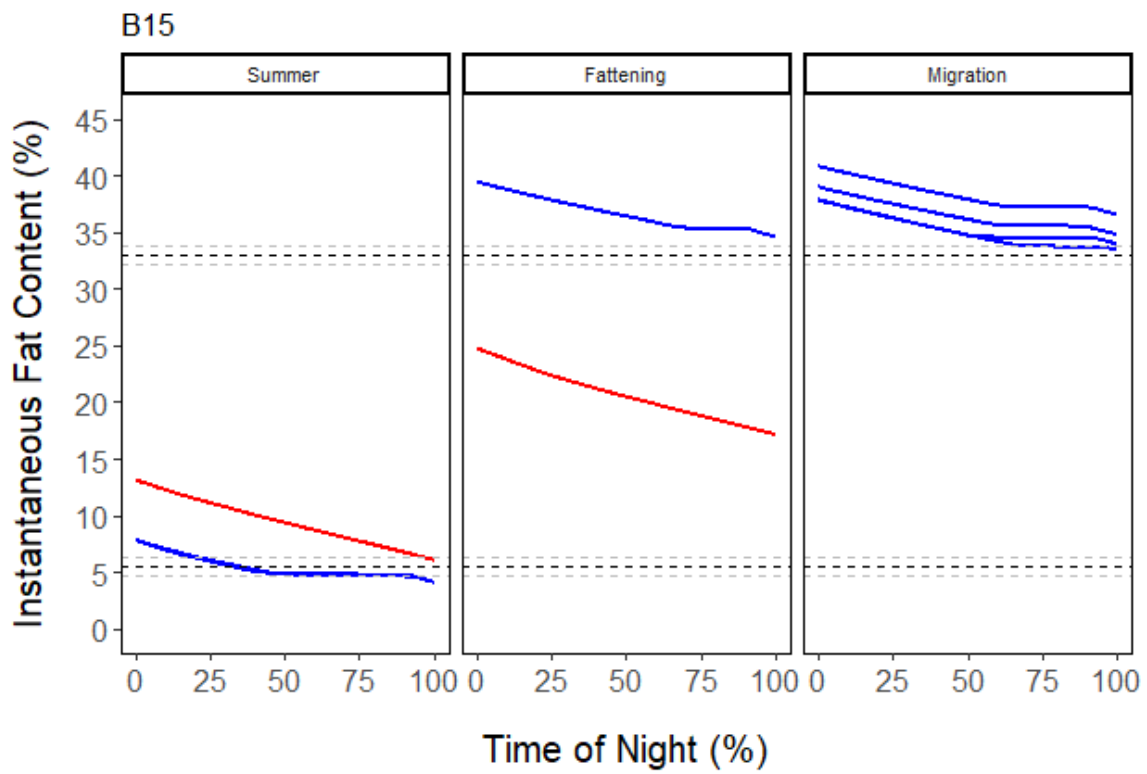



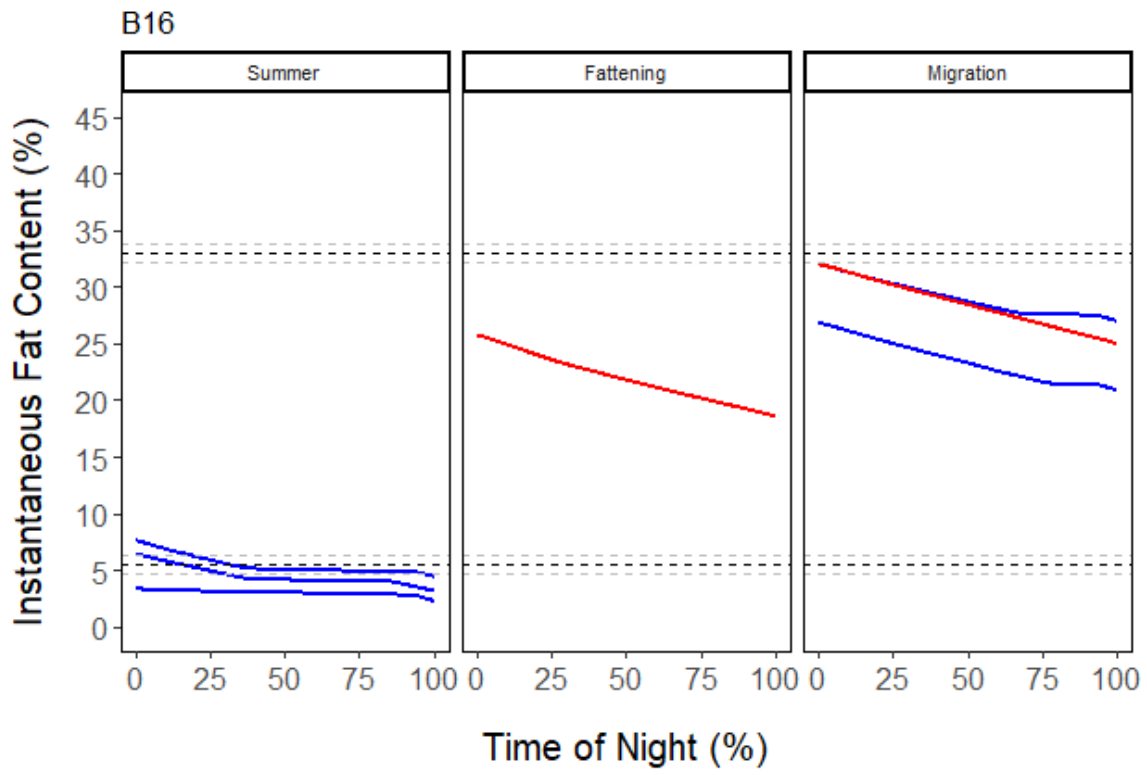

Supplement: supp2 [file elife-70062-supp2-v3.pdf]
